# Supplementary material for: Research on Processing-Induced Chemical Variations in Polygonatum Cyrtonema Rhizome by Integrating Metabolomics and Glycomics
Source: MDPI journal article supplement (doi:10.3390/molecules27185869), 2022-09-10
Supplement: s1 [file s1]

## Supplementary File

### Research on Processing-Induced Chemical Variations in *Polygonatum Cyrtonema* Rhizome by Integrating Metabolomics and Glycomics

Tong Jiang<sup>1</sup>, Tong Wu<sup>1</sup>, Peiyun Gao<sup>2</sup>, Lixia Wang<sup>1</sup>, Xiaoyun Yang<sup>1</sup>, Xiaoxu Chen<sup>1</sup>, Yingying Chen<sup>1</sup>, Chunyu Yue<sup>2</sup>, Keqing Liang<sup>1</sup>, Liying Tang<sup>1,\*</sup> and Zhuju Wang<sup>1,\*</sup>

<sup>1</sup> Institute of Chinese Materia Medica, China Academy of Chinese Medical Science, Beijing 100700, China

<sup>2</sup> College of Pharmacy, Henan University of Chinese Medicine, Zhengzhou 450046, China

\* Correspondence: lytang@icmm.ac.cn (L.T.); zjwang@icmm.ac.cn (Z.W.)

## Section 1. Method optimization and validation

### 1.1. Method optimization and validation of secondary metabolites

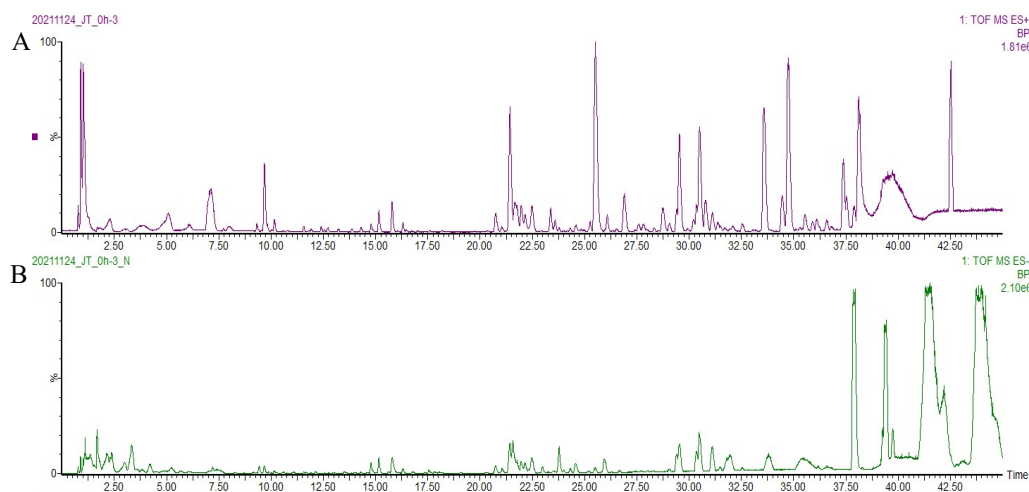

**Figure. S1** The base peak intensity (BPI) chromatogram of secondary metabolites in raw *Polygonatum cyrtonema* rhizome in positive (A) and negative ion mode (B).

More secondary metabolites were detected in positive ion mode, so the analysis of secondary metabolites was performed in positive ion mode (Fig. S1).

A mixed standard solution was prepared with methanol at different concentrations which contained 0.89 mg/mL of kaempferol, 0.64 mg/mL of rutin, 0.52 mg/mL of (20 $\alpha$ ,22R,25S)-Spirosta-5-ene-3 $\beta$ -ol. The method validation included precision,

repeatability and stability. The mixed standard solutions were used for method validation. The precision was investigated by one sample with six replicate injections. The repeatability of the method was assessed by performing six replicate solutions. The stability of those analytes was assessed by analyzing the solution at 0, 2, 4, 6, 8, 12 and 24 h. The validation was expressed as the RSD and the RSD values were less than 3.0 % (Table S1). The above results showed that UPLC-Q-TOF-MS/MS method could be used for the analysis of PCR metabolites.

**Table S1** The method validation of UPLC-Q-TOF-MS/MS of secondary metabolites

| Compound                                            | Precision<br>(RSD%) | Repeatability<br>(RSD%) | Stability<br>(RSD%) |
|-----------------------------------------------------|---------------------|-------------------------|---------------------|
| kaempferol                                          | 1.91                | 1.69                    | 1.64                |
| rutin                                               | 3.00                | 2.85                    | 2.43                |
| (20 $\alpha$ ,22R,25S)-Spirosta-5-ene-3 $\beta$ -ol | 2.87                | 2.76                    | 2.77                |

## 1.2. Method validation of monosaccharides and oligosaccharides

A mixed sugar standard solution was prepared with 20% acetonitrile at different concentrations which contained 1.048 mg/mL of D-fructose, 1.028 mg/mL of sucrose, 1.01 mg/mL of 1-kestose, and 1.05 mg/mL of nistose. The precision, stability and repeatability of the method were verified by the mixed standard of sugar and the RSD values were less than 3.0 %. The above results showed that UPLC-Q-TOF-MS/MS method could be used for the analysis of monosaccharides and oligosaccharides in PCR.

**Table S2** The method validation of UPLC-Q-TOF-MS/MS of monosaccharides and oligosaccharide

| Compound   | Precision<br>(RSD%) | Repeatability<br>(RSD%) | Stability<br>(RSD%) |
|------------|---------------------|-------------------------|---------------------|
| D-fructose | 2.81                | 3.00                    | 2.65                |
| sucrose    | 1.69                | 1.75                    | 1.63                |
| 1-kestose  | 2.75                | 2.66                    | 2.97                |
| nistose.   | 2.34                | 2.49                    | 2.14                |

## 1.3. Method validation of the monosaccharide composition determination.

The precision, stability and repeatability of the method were verified by the sample solution and the RSD values were less than 3.0 %.

**Table S3** Calibration curves, sensitivity, precision, repeatability, and stability of the monosaccharide composition determination assay

| Compound | Range<br>( $\mu\text{g}$ ) | Equation              | $R^2$  | Precision<br>(RSD%) | Repeatability<br>(RSD%) | Stability<br>(RSD%) |
|----------|----------------------------|-----------------------|--------|---------------------|-------------------------|---------------------|
| Man      | 10-500                     | $y=29770x+27170.3$    | 0.9999 | 0.07                | 1.17                    | 0.86                |
| Rib      | 5-250                      | $y=42127.2x-129706.4$ | 0.9999 | 1.51                | 0.49                    | 1.00                |
| GlcA     | 5-500                      | $y=23496.7x+75784.2$  | 0.9999 | -                   | -                       | -                   |
| GalA     | 5-500                      | $y=25336.6x+27998.5$  | 0.9999 | 1.55                | 2.21                    | 1.33                |
| Fru      | 5-500                      | $y=21670x+134629.2$   | 0.9999 | 0.23                | 0.21                    | 0.31                |
| Gal      | 5-500                      | $y=27127.6x+104091.9$ | 0.9999 | 0.21                | 0.22                    | 0.24                |
| Xyl      | 5-500                      | $y=35112x-2450.3$     | 0.9999 | 0.92                | 1.90                    | 1.78                |

#### 1.4. Method validation of the molecular weight determination.

**Table S4** Calibration curve, sensitivity, precision, repeatability, and stability of the molecular weight determination assay

| Equation                       | Range<br>(Da) | $R^2$  | Precision<br>(RSD%) | Repeatability<br>(RSD%) | Stability<br>(RSD%) |
|--------------------------------|---------------|--------|---------------------|-------------------------|---------------------|
| $\lg M_w = -0.7229 t + 9.3918$ | 180-300600    | 0.9959 | 0.6                 | 0.59                    | 2.99                |

#### 1.5. Calibration curves and sensitivity of the glycoprotein, uronic acid and total polysaccharide determination assays.

**Table S5** Calibration curves and sensitivity of the glycoprotein, uronic acid and total polysaccharide determination assays

| Detection components | Equation           | Range              | $R^2$  |
|----------------------|--------------------|--------------------|--------|
| glycoprotein         | $y=4.3178x+0.0883$ | 0.0329-0.1975 mg   | 0.9995 |
| uronic acid          | $y=3.623x+0.0208$  | 0.0208-0.1768 mg   | 0.9994 |
| total polysaccharide | $y=0.0045x+0.0067$ | 0-60 $\mu\text{g}$ | 0.9998 |

## Section 2. The collection information of plant material is listed as follows.

**Table S6** Summary of information of 38 batches of PCR samples.

| Sample No. | Harvesting time | planting place/time                              | Processing time |
|------------|-----------------|--------------------------------------------------|-----------------|
| S1         | 30 October 2020 | Standardized planting base, Yongzhou, Hunan/2017 | Raw             |
| S2         | 30 October 2020 | Standardized planting base, Yongzhou, Hunan/2017 | Raw             |
| S3         | 30 October 2020 | Standardized planting base, Yongzhou, Hunan/2017 | Raw             |

| Sample No. | Harvesting time | planting place/time                              | Processing time |
|------------|-----------------|--------------------------------------------------|-----------------|
| S4         | 30 October 2020 | Standardized planting base, Yongzhou, Hunan/2017 | Raw             |
| S5         | 30 October 2020 | Standardized planting base, Yongzhou, Hunan/2017 | Raw             |
| S6         | -               | Processing in laboratory                         | 1h              |
| S7         | -               | Processing in laboratory                         | 1h              |
| S8         | -               | Processing in laboratory                         | 1h              |
| S9         | -               | Processing in laboratory                         | 2h              |
| S10        | -               | Processing in laboratory                         | 2h              |
| S11        | -               | Processing in laboratory                         | 2h              |
| S12        | -               | Processing in laboratory                         | 3h              |
| S13        | -               | Processing in laboratory                         | 3h              |
| S14        | -               | Processing in laboratory                         | 3h              |
| S15        | -               | Processing in laboratory                         | 4h              |
| S16        | -               | Processing in laboratory                         | 4h              |
| S17        | -               | Processing in laboratory                         | 4h              |
| S18        | -               | Processing in laboratory                         | 6h              |
| S19        | -               | Processing in laboratory                         | 6h              |
| S20        | -               | Processing in laboratory                         | 6h              |
| S21        | -               | Processing in laboratory                         | 8h              |
| S22        | -               | Processing in laboratory                         | 8h              |
| S23        | -               | Processing in laboratory                         | 8h              |
| S24        | -               | Processing in laboratory                         | 10h             |
| S25        | -               | Processing in laboratory                         | 10h             |
| S26        | -               | Processing in laboratory                         | 10h             |
| S27        | -               | Processing in laboratory                         | 12h             |
| S28        | -               | Processing in laboratory                         | 12h             |
| S29        | -               | Processing in laboratory                         | 12h             |
| S30        | -               | Processing in laboratory                         | 14h             |
| S31        | -               | Processing in laboratory                         | 14h             |
| S32        | -               | Processing in laboratory                         | 14h             |
| S33        | -               | Processing in laboratory                         | 16h             |
| S34        | -               | Processing in laboratory                         | 16h             |
| S35        | -               | Processing in laboratory                         | 16h             |
| S36        | -               | Processing in laboratory                         | 18h             |
| S37        | -               | Processing in laboratory                         | 18h             |
| S38        | -               | Processing in laboratory                         | 18h             |
